# Supplementary material for: RsmG forms stable complexes with premature small subunit rRNA during bacterial ribosome biogenesis
Source: Royal Society of Chemistry journal article supplement (doi:10.1039/d0ra02732d), 2020-01-01
Supplement: d0ra02732d1.pdf [file d0ra02732d1.pdf]

## Electronic Supplementary Information for RSC Advances

### **RsmG forms stable complexes with premature small subunit rRNA during bacterial ribosome biogenesis**

**Sudeshi M. Abedeera, Caitlin M. Hawkins, and Sanjaya C. Abeyirigunawardena\***

Department of Chemistry and Biochemistry, Kent State University, OH, USA

\*Corresponding author: **Sanjaya C. Abeyirigunawardena**, E-mail: [sabeysir@kent.edu](mailto:sabeysir@kent.edu)

#### **Table of Contents**

- Fig. S1: Detection of Cy3-labeled complementary DNA primer binding to 5'-domain rRNA constructs by EMSA
- Fig. S2: Filter Binding assay for RsmG binding with RIII5D and 5D21 rRNA constructs
- Fig. S3: Methylation activity of RsmG for various rRNA-rProtein complexes with RIII5D and 5D21

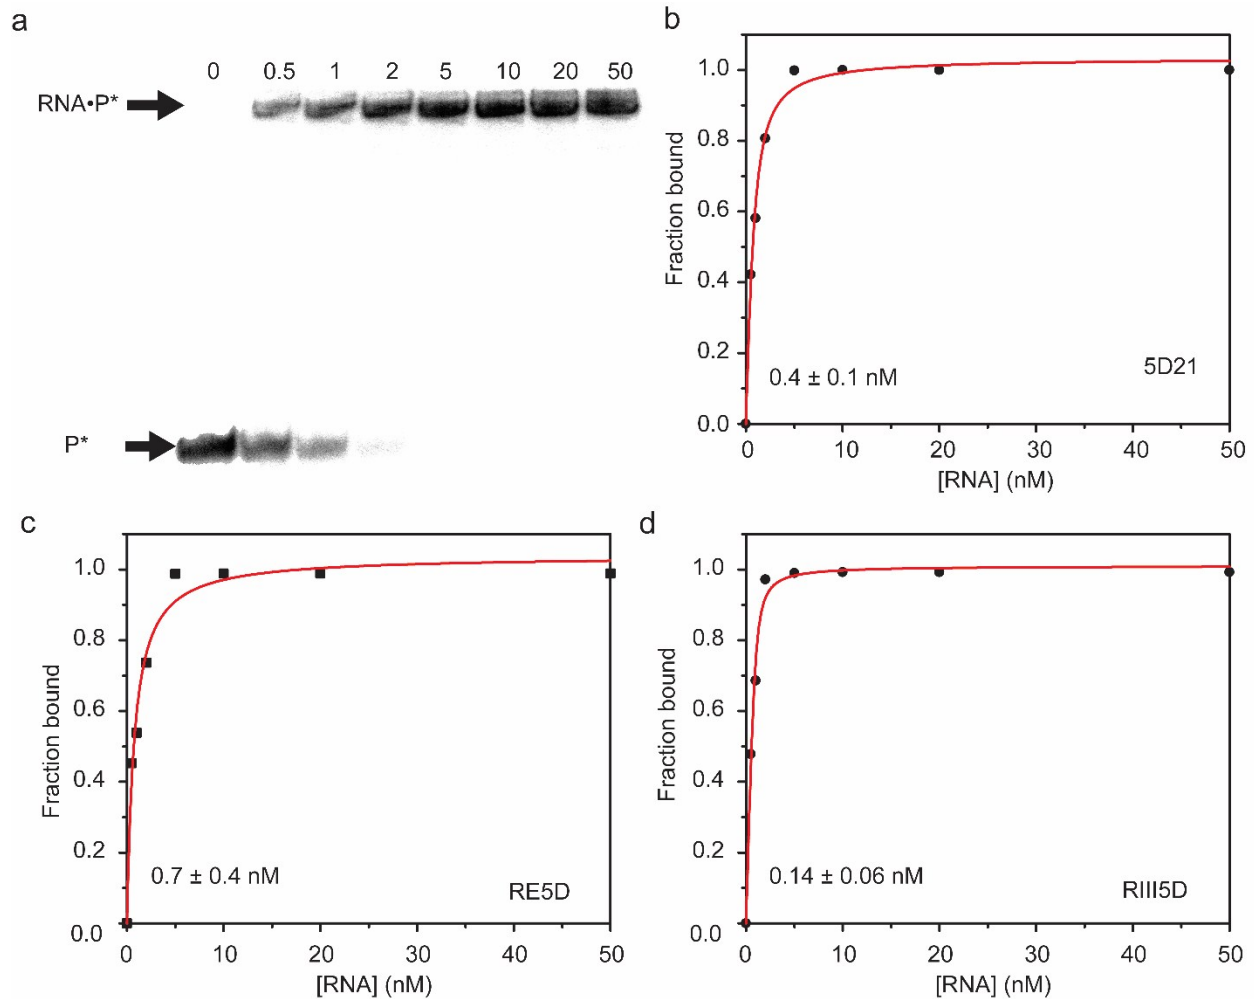

**Fig. S1** Cy3-labeled complementary DNA primer binds to all three 5'-domain rRNAs with similar affinity. (a) An example for Electrophoretic Mobility Shift Assays (EMSA) of DNA primer is shown. DNA is fluorescently labelled at its 5'-end. High- and low-mobility species represent free DNA primer (P\*) and RNA-DNA complex (RNA·P\*), respectively. Titration curves for (b) 5D21, (c) RE5D, and (d) RIII5D are shown.

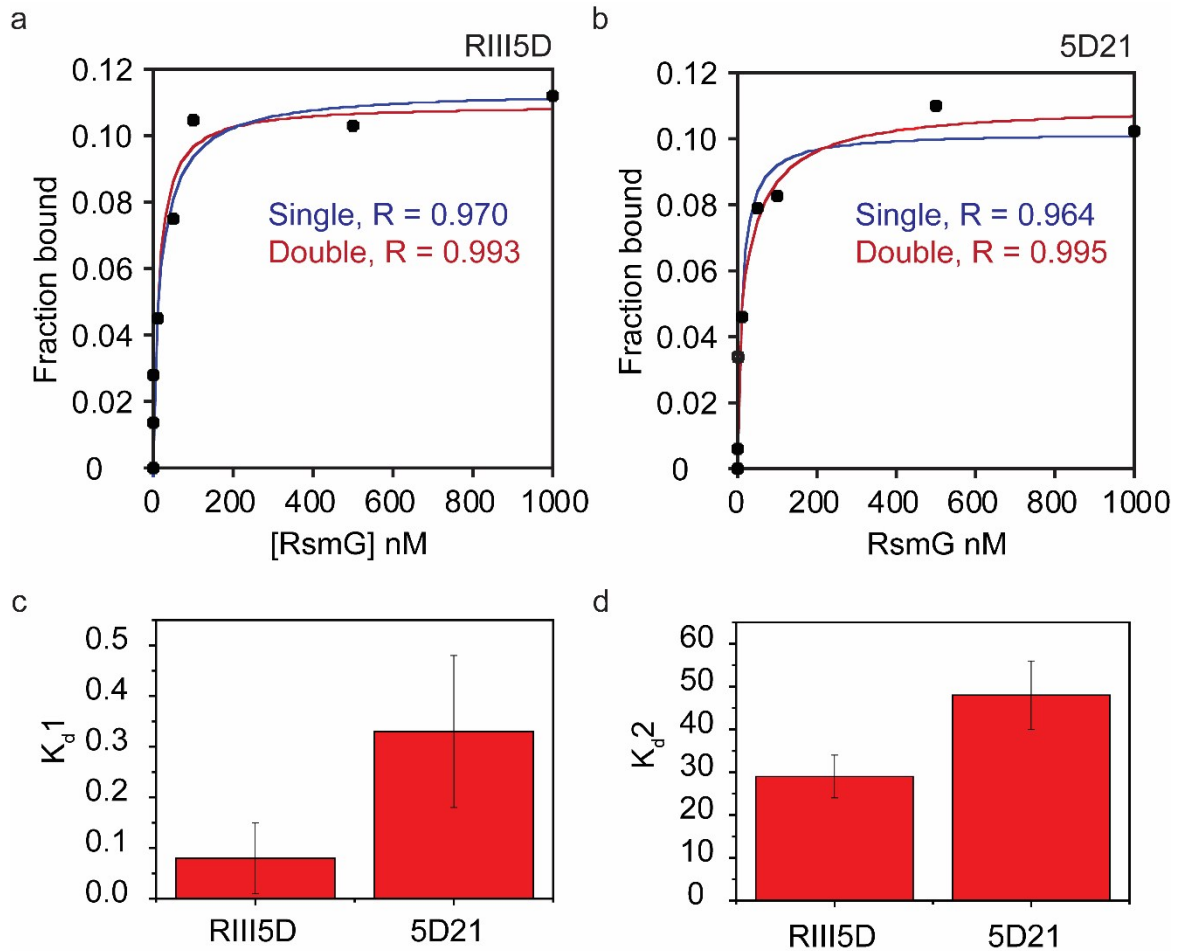

**Fig. S2** Filter binding assays of RsmG. Titration curves for RsmG binding with (a) RIII5D and (b) 5D21 rRNA constructs are shown. Titration curves fitted to single (blue line) and double (red line) binding equations are shown. Equilibrium dissociation constants for (c) tight ( $K_{d1}$ ) (d) light ( $K_{d2}$ ) binding of RsmG is shown.

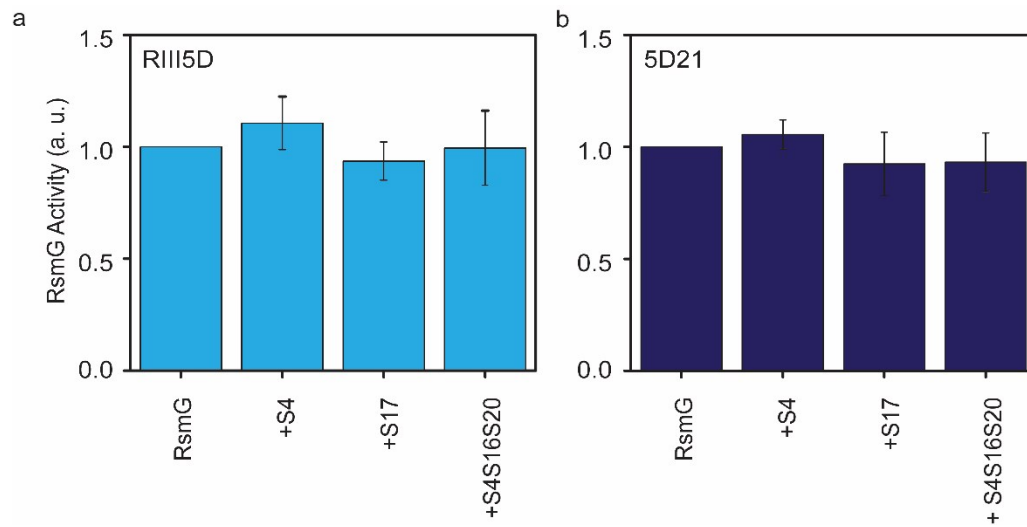

**Fig. S3** Methylation activity of RsmG for various rRNA-rProtein complexes with (a) RIII5D (b) 5D21 are shown. Error bars represent statistical standard error from triplicates.
